# Supplementary material for: The Influence of CBD Parameters on the Energy Gap of ZnS Narcissus-Like Nanostructured Thin Films
Source: MDPI journal article supplement (doi:10.3390/coatings11091131), 2021-09-17
Supplement: s1 [file s1]

Archive with 1 entries (1 files):
- coatings-1338793-supplementary.pdf
