# Supplementary material for: The Influence of CBD Parameters on the Energy Gap of ZnS Narcissus-Like Nanostructured Thin Films
Source: MDPI journal article supplement (doi:10.3390/coatings11091131), 2021-09-17
Supplement: s1 [file s1 › coatings-1338793-supplementary.pdf]

# Supplementary Materials: The Influence of CBD Parameters on the Energy Gap of ZnS Narcissus-Like Nanostructured Thin Films

Mohammed Hussein Khalil <sup>1</sup>, Raghad Y. Mohammed <sup>2</sup> and Mohammed Aziz Ibrahim <sup>3,\*</sup>

Department of Physics, College of Science, University of Duhok, Kurdistan Region 42001, Iraq; mohamadswary@uod.ac (M.H.K.); ssraghad@uod.ac (R.Y.M.)

\* Correspondence: m\_aziz7951@uod.ac; Tel.: +964-750-458-2358

**Citation:** Khalil, M.H.; Mohammed, R.Y.; Ibrahim, M.A. The Influence of CBD Parameters on the Energy Gap of ZnS Narcissus-Like Nanostructured Thin Films. *Coatings* **2021**, *11*, x. <https://doi.org/10.3390/xxxxx>

Academic Editors: Mircea Nasui; Angela De Bonis

Received: 28 July 2021

Accepted: 7 September 2021

Published: date

**Publisher's Note:** MDPI stays neutral with regard to jurisdictional claims in published maps and institutional affiliations.

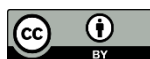

**Copyright:** © 2021 by the authors. Submitted for possible open access publication under the terms and conditions of the Creative Commons Attribution (CC BY) license (<http://creativecommons.org/licenses/by/4.0/>).

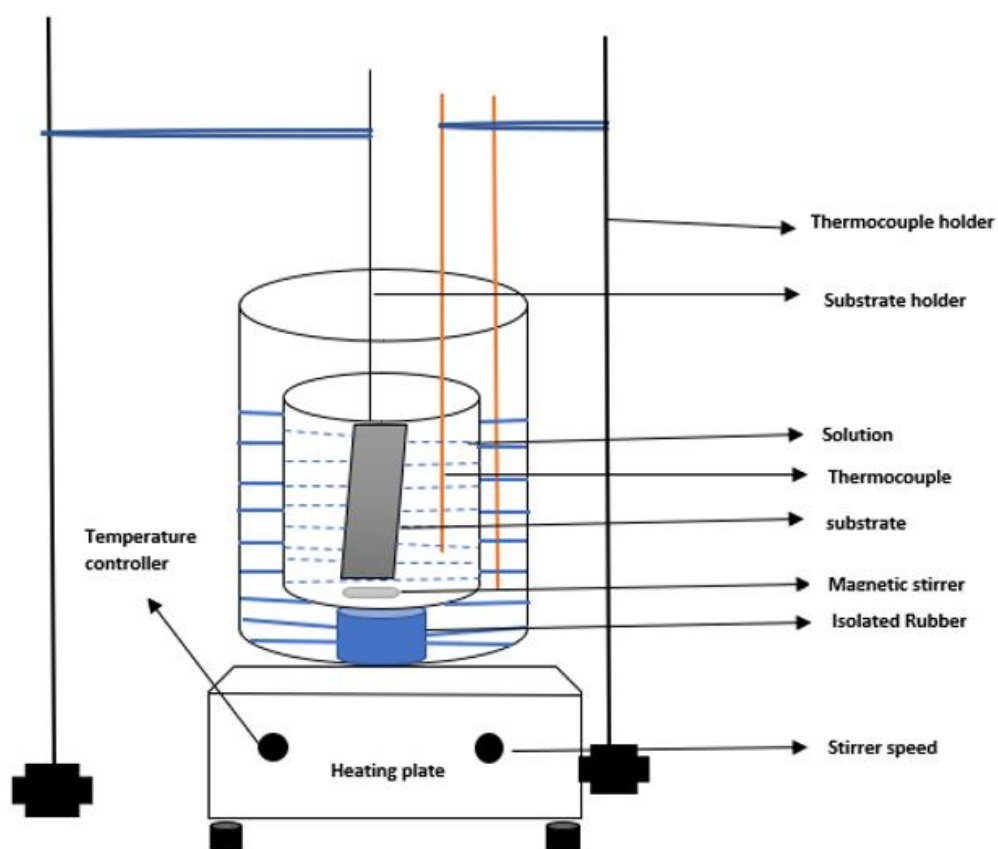

**Figure S1.** Schematic representation of the CBD system.

**Table S1.** CBD different deposition parameters. At each deposition, one of the parameters was changed and all others were fixed to get the optimized condition.

| Time(minutes) | pH   | Temperature(C) | Zinc acetate(M) | Thiourea(M) |
|---------------|------|----------------|-----------------|-------------|
| 5             | 9    | 40             | 0.05            | 0.05        |
| 10            | 9.5  | 45             | 0.1             | 0.1         |
| 20            | 10   | 55             | 0.15            | 0.15        |
| 30            | 10.5 | 65             | 0.2             | 0.2         |
| 40            | 11   | 75             | 0.25            | 0.25        |
| 50            | 11.5 | -              | 0.3             | 0.3         |
| 60            | -    | -              | -               | -           |

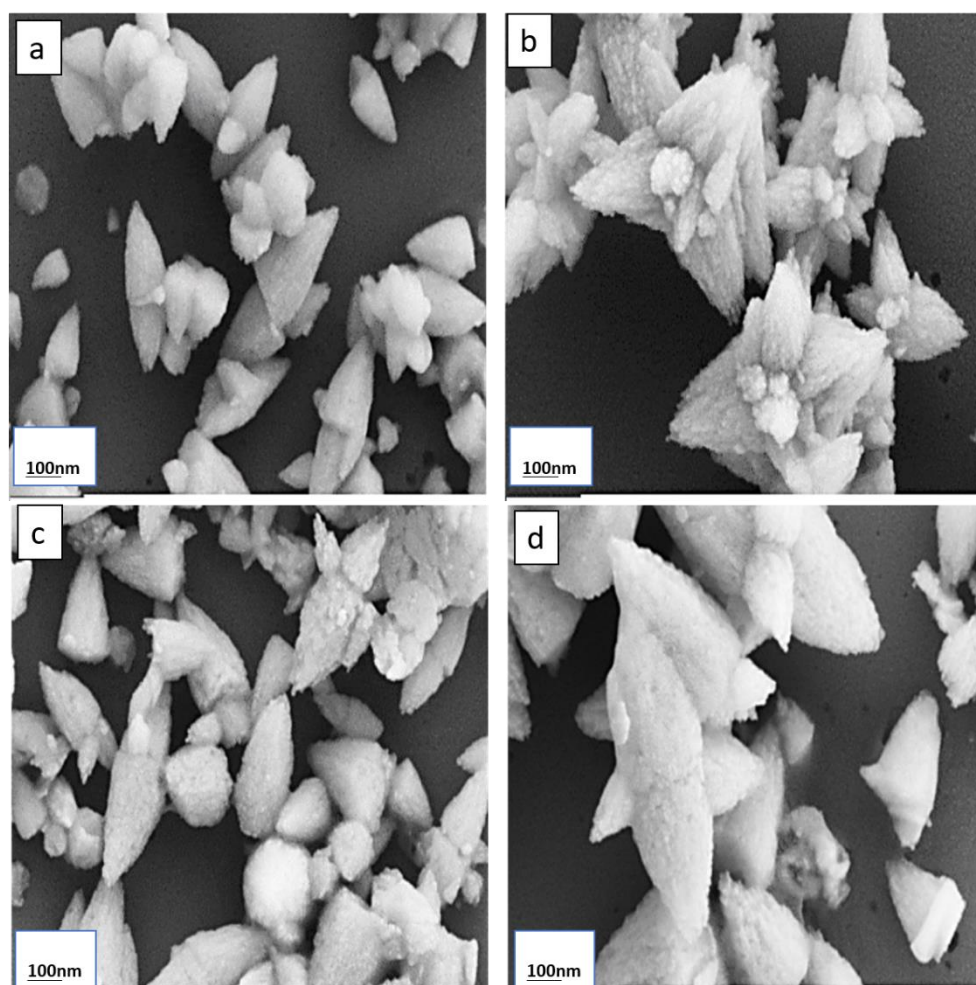

**Figure S2.** FESEM images of ZnS Narcissus-Like Nanostructure growth with variation in deposition time (a) 5 min, (b) 10 min, (c) 30 min, (d) 60 min. The films Prepared at  $T_d = 65^\circ\text{C}$ ,  $\text{pH} = 10$ ,  $\text{Zn conc.} = 0.2\text{ M}$ ,  $\text{Tu conc.} = 0.2\text{ M}$ .

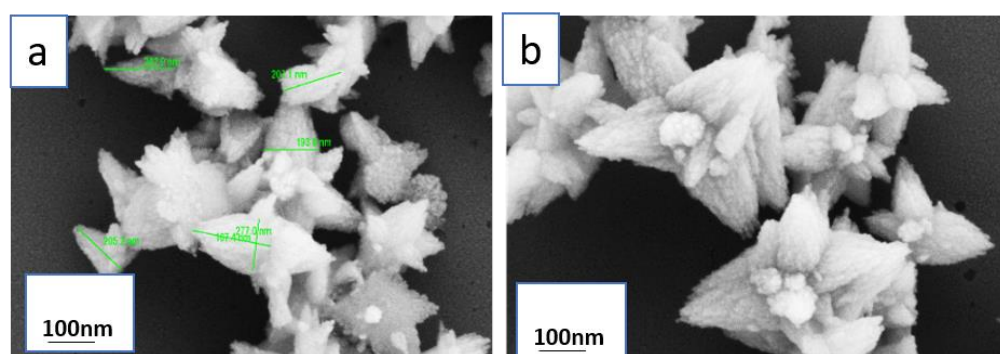

**Figure S3.** FESEM images of ZnS thin film formed with the different deposition temperature. (a)  $45^\circ\text{C}$ , (b)  $65^\circ\text{C}$ . The films Prepared at  $\text{pH} = 10$ ,  $t = 10\text{ min}$ .  $\text{Zn conc.} = 0.2\text{ M}$ ,  $\text{Tu conc.} = 0.2\text{ M}$ .

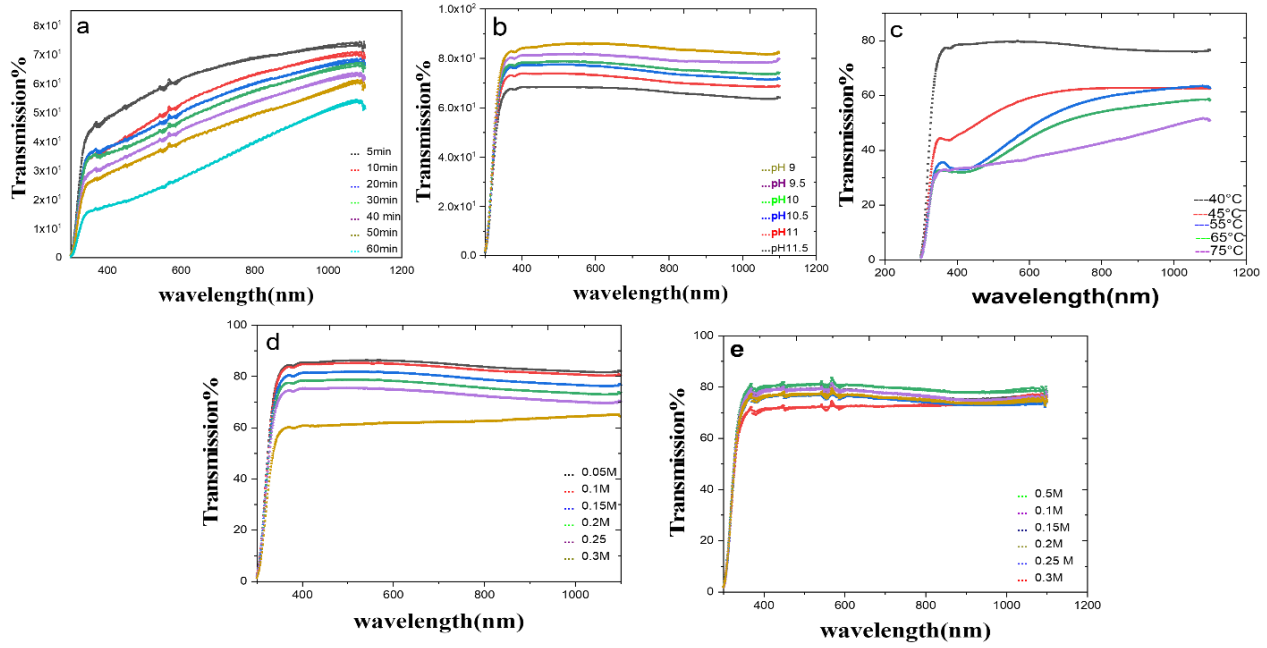

**Figure S4.** Optical transmission spectra of ZnS thin films deposited at various (a) Times (b) pH (c) Temperatures (d) Zinc acetate concentration (e) Thiourea concentration.

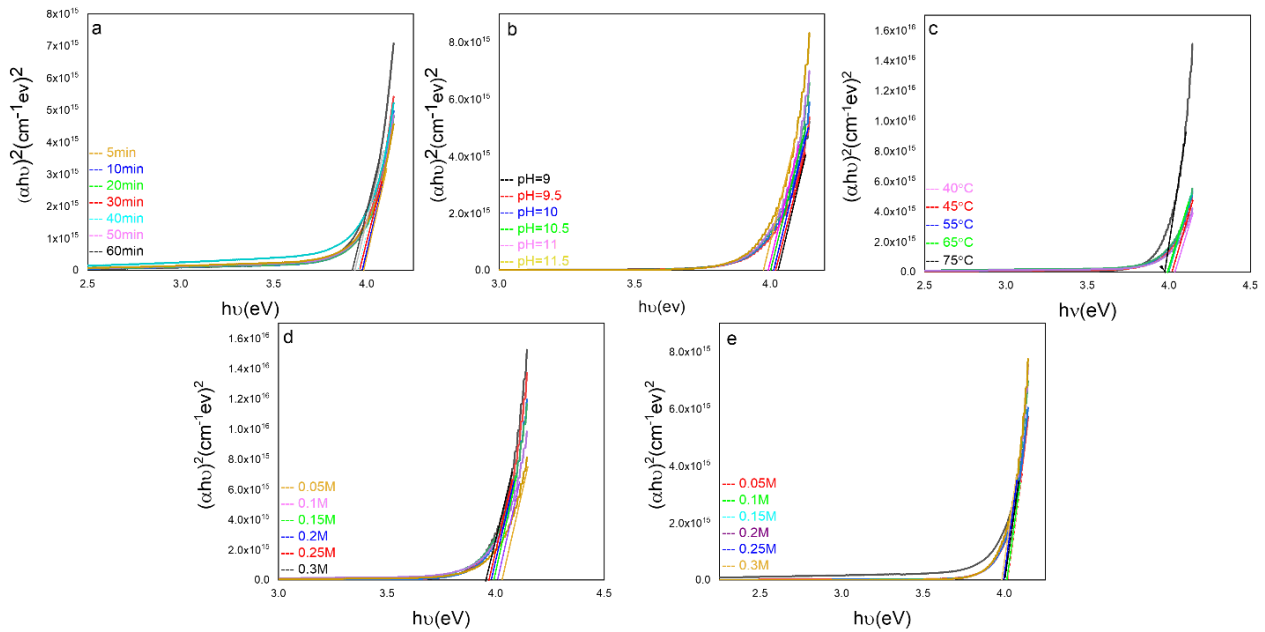

**Figure S5.** The optical energy gap of ZnS thin films deposited at various (a) Times (b) pH (c) Temperatures (d) Zinc acetate concentration (e) Thiourea concentration.
